# Supplementary material
Source: publisher figshare collection journal article supplement (https://acs.figshare.com/ndownloader/files/4662334)
Supplement: Supplementary file 1 [file 4662334]

## Supporting Information

**Table S1.** CD parameters and Rpn values of the PT-assembled collagen peptides, non-templated collagen peptides, (Pro-Pro-Gly)<sub>3</sub>, (Pro-Hyp-Gly)<sub>10</sub>, and calf-skin collagen.

| Samples                     | Maximum, nm<br>(ellipticity)  | Crossover, nm<br>(ellipticity) | Minimum, nm<br>(ellipticity)   | Rpn* |
|-----------------------------|-------------------------------|--------------------------------|--------------------------------|------|
| PT-CP1                      | 225 (0.26 x 10 <sup>4</sup> ) | 218                            | 199 (-2.40 x 10 <sup>4</sup> ) | 0.11 |
| PT-CP2                      | 223 (0.22 x 10 <sup>4</sup> ) | 217                            | 201 (-2.02 x 10 <sup>4</sup> ) | 0.11 |
| PT-CP3                      | 221 (0.31 x 10 <sup>4</sup> ) | 215                            | 200 (-1.72 x 10 <sup>4</sup> ) | 0.18 |
| PT-CP4                      | 224 (0.45 x 10 <sup>4</sup> ) | 217                            | 202 (-2.64 x 10 <sup>4</sup> ) | 0.17 |
| CP1                         | 226 (0.11 x 10 <sup>4</sup> ) | 220                            | 201 (-1.93 x 10 <sup>4</sup> ) | 0.06 |
| CP2                         | 226 (0.03 x 10 <sup>4</sup> ) | 222                            | 200 (-1.27 x 10 <sup>4</sup> ) | 0.02 |
| CP3                         | 222 (0.06 x 10 <sup>4</sup> ) | 218                            | 202 (-1.01 x 10 <sup>4</sup> ) | 0.06 |
| CP4                         | 225 (0.22 x 10 <sup>4</sup> ) | 219                            | 201 (-2.40 x 10 <sup>4</sup> ) | 0.09 |
| (Pro-Pro-Gly) <sub>3</sub>  | ---                           | ---                            | 200 (-0.94 x 10 <sup>4</sup> ) | ---  |
| (Pro-Hyp-Gly) <sub>10</sub> | 225 (0.32 x 10 <sup>4</sup> ) | 218                            | 199 (-2.97 x 10 <sup>4</sup> ) | 0.11 |
| Calf-skin collagen          | 222 (0.26 x 10 <sup>4</sup> ) | 214                            | 197 (-2.11 x 10 <sup>4</sup> ) | 0.12 |

\* Rpn represents the ratio of positive peak over the negative peak intensity in the CD spectra.

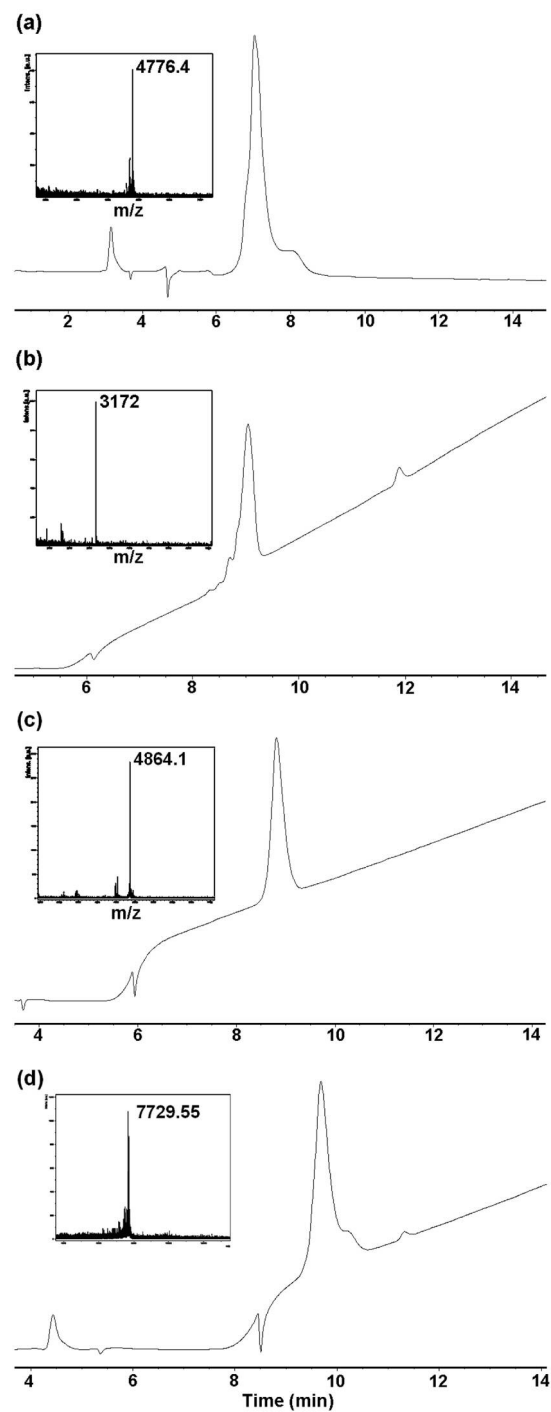

**Figure S1.** Analytical RP-HPLC chromatograms of purified (a) PT-CP1, (b) PT-CP2, (c) PT-CP3, and (d) PT-CP4 and their respective MALDI-TOF MS spectra (left). HPLC buffer gradient is from 90%A and 10%B to 55%A and 45%B in 30 mins at a total flowrate of 1 ml/min, where buffer A is 01% TFA in H<sub>2</sub>O and buffer B is 0.1% TFA in acetonitrile. Injection volume was 50  $\mu$ l.

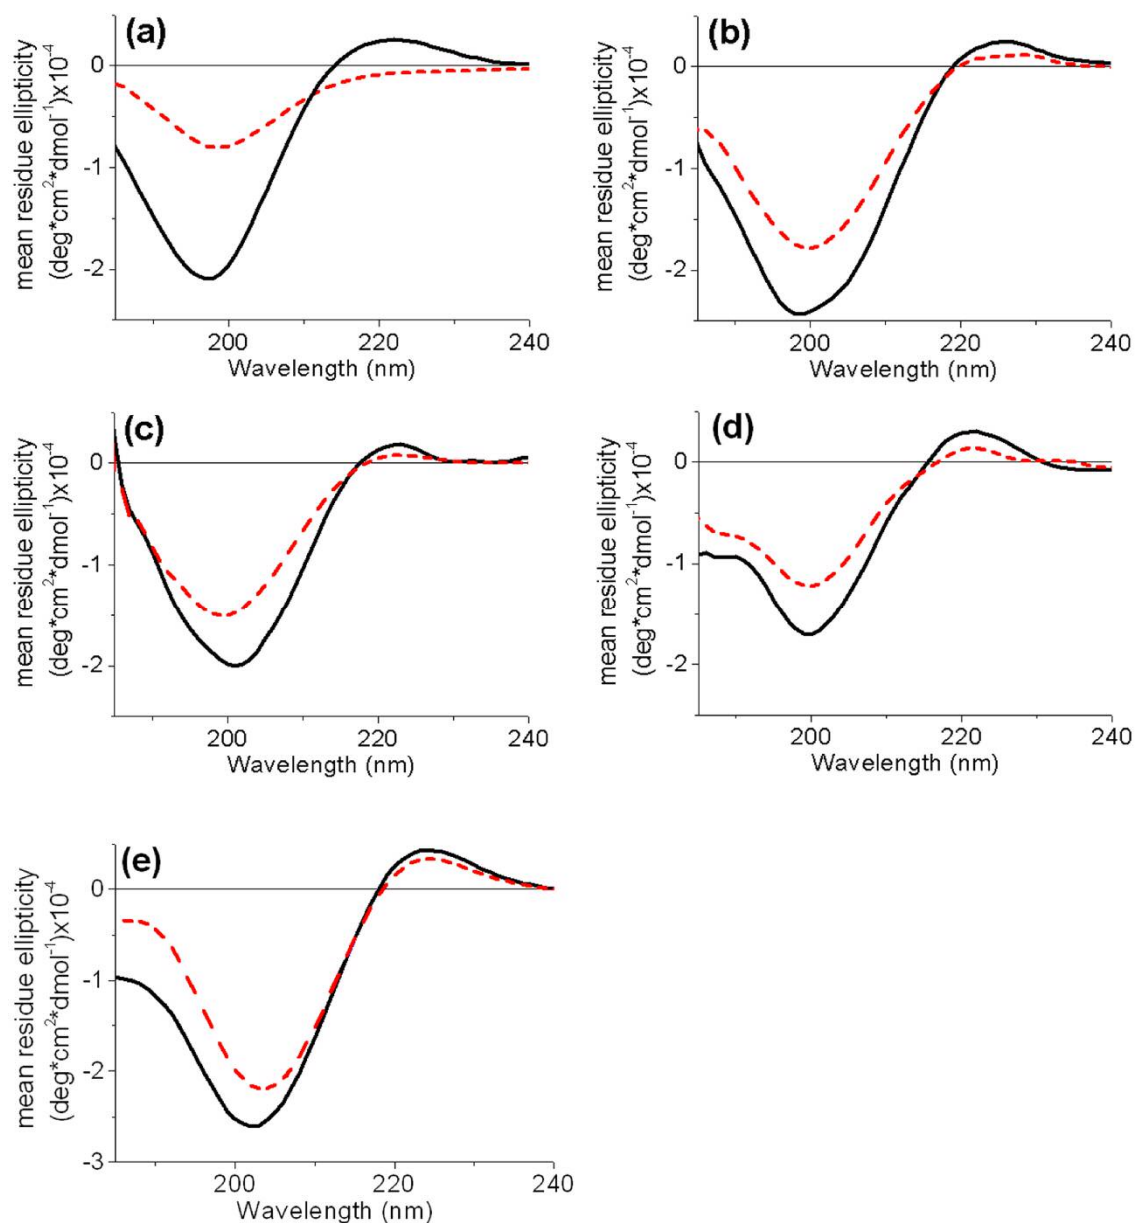

**Figure S2.** CD spectra of natural collagen and PT-assembled collagen peptides at 20°C (solid line) and 70°C (segmented line): (a) calf-skin collagen, (b) PT-CP1, (c) PT-CP2, (d) PT-CP3, and (e) PT-CP4 in water.

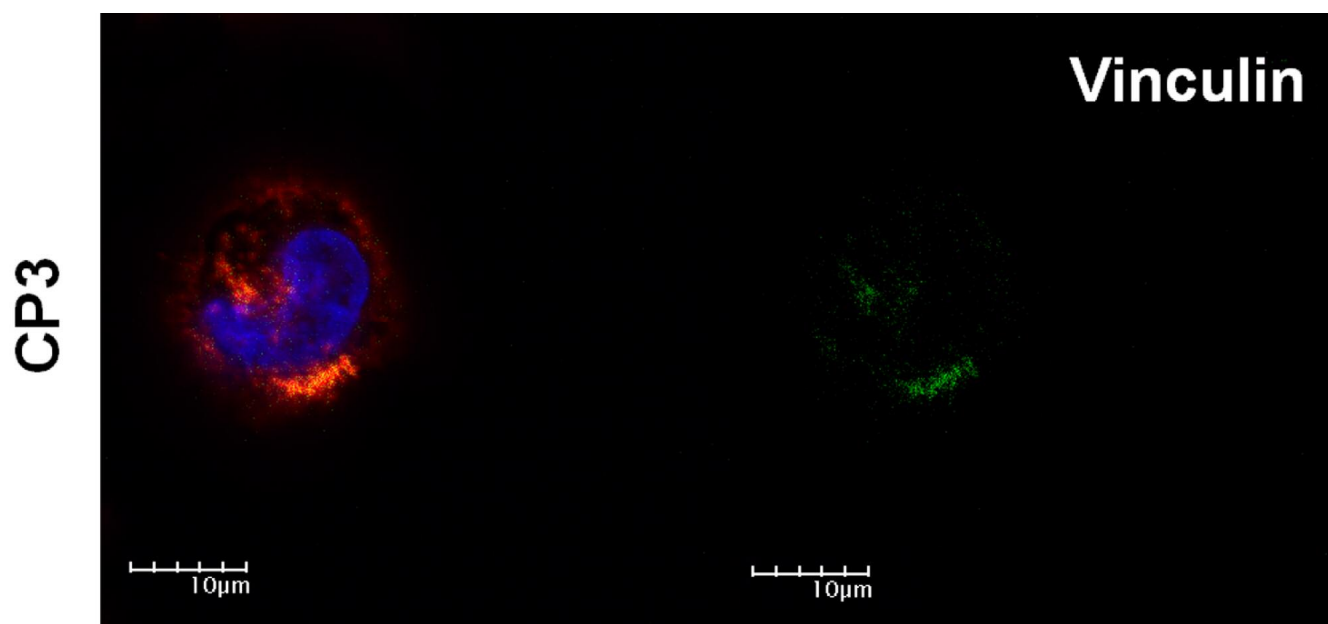

**Figure S3.** Immunofluorescence images of Hep3B cells on CP3. Confocal images were taken after the cells, in serum-free medium, were seeded on different surfaces for 3 hours.
